# Supplementary material
Source: MDPI journal article supplement (https://www.mdpi.com/2311-7524/9/5/588)
Supplement: s1 [file s1]

- 1 **Table S1.** qRT-PCR primers for the *HmHSF* genes.
- 2 **Table S2.** Secondary structure prediction of *HmHSF*.
